# Supplementary material
Source: Springer Nature journal article supplement (https://www.springermedizin.de/resource/supplementary/12936_2011_2077_MOESM3_ESM.pdf/9543396)

A

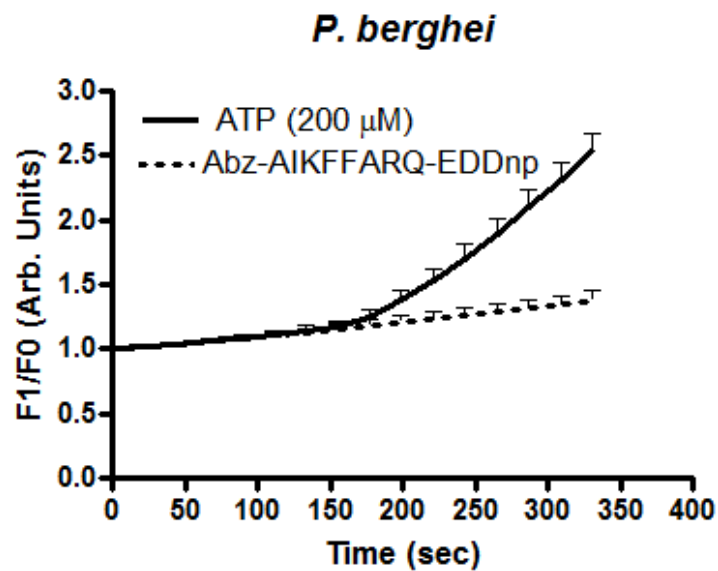

B

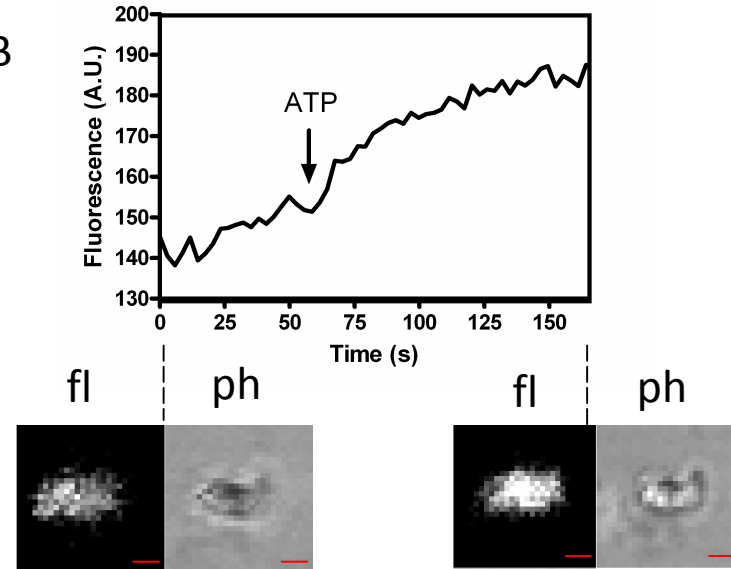

C

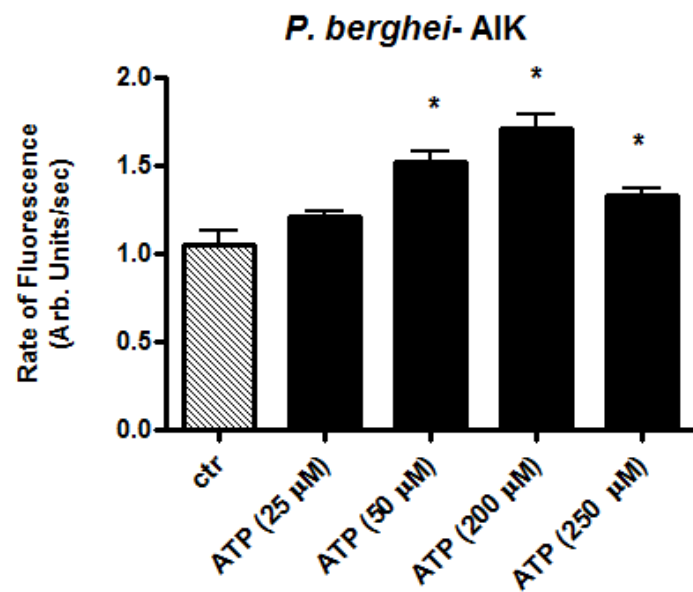

D

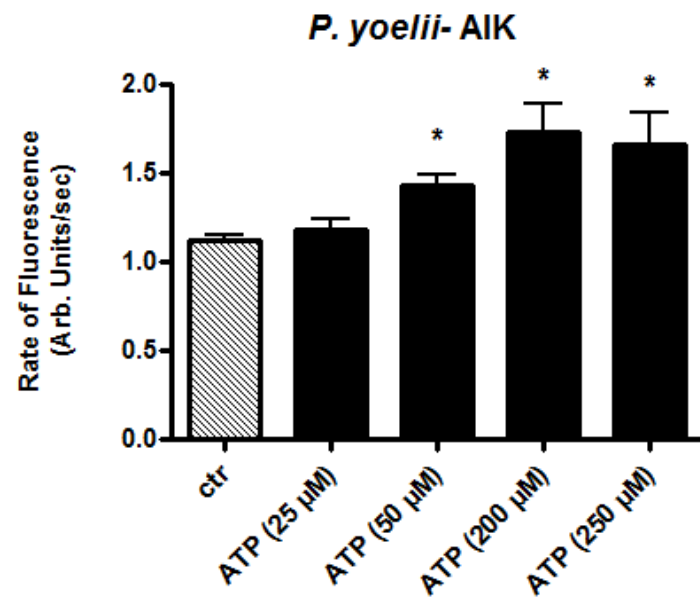

Supplement: MOESM3 [file 9543396]
